# Supplementary material for: A pairwise pseudo-likelihood approach for regression analysis of left-truncated failure time data with various types of censoring
Source: Springer Nature journal article supplement (doi:10.1186/s12874-023-01903-x), 2023-04-04
Supplement: MOESM1 [file 25207546]

# Supplementary Materials for "A Pairwise Pseudo-Likelihood Approach for Regression Analysis of Left-Truncated Failure Time Data with Various Types of Censoring"

Li Shao<sup>1</sup>, Hongxi Li<sup>1</sup>, Shuwei Li<sup>1</sup>, Jianguo Sun<sup>2</sup>

<sup>1</sup> School of Economics and Statistics, Guangzhou University, Guangzhou, China

<sup>2</sup> Department of Statistics, University of Missouri, Columbia, Missouri, USA

January 30, 2023

## Appendix: An EM Algorithm for Maximizing the Conditional Likelihood

The observed data conditional likelihood is given by

$$\begin{aligned} L_n^C(\boldsymbol{\beta}, \Lambda) &= \prod_{i=1}^n \frac{\{\lambda(t) \exp(\mathbf{Z}_i^\top \boldsymbol{\beta}) S(T_i | \mathbf{Z}_i)\}^{\Delta_i} \{S(L_i | \mathbf{Z}_i) - S(R_i | \mathbf{Z}_i)\}^{1-\Delta_i}}{S(A_i | \mathbf{Z}_i)} \\ &= \prod_{i=1}^n [\lambda(t) \exp(\mathbf{Z}_i^\top \boldsymbol{\beta}) \exp\{-(\Lambda(T_i) - \Lambda(A_i)) \exp(\mathbf{Z}_i^\top \boldsymbol{\beta})\}]^{\Delta_i} \\ &\quad \times [\exp\{-(\Lambda(L_i) - \Lambda(A_i)) \exp(\mathbf{Z}_i^\top \boldsymbol{\beta})\} - \exp\{-(\Lambda(R_i) - \Lambda(A_i)) \exp(\mathbf{Z}_i^\top \boldsymbol{\beta})\}]^{1-\Delta_i}. \end{aligned}$$

We assume that  $\Lambda(t)$  is a step function with finite jump sizes at  $t_1 \cdots < t_{K_n}$ , the ordered sequence of unique finite observation times, exactly-observed failure times and truncation times. The non-negative jump size of  $\Lambda(t)$  at  $t_k$  is denoted as  $\lambda_k$  for  $k = 1, \dots, K_n$ . Then  $L_n^C(\boldsymbol{\beta}, \Lambda)$  can

be rewritten as

$$L_{1n}^C(\boldsymbol{\theta}) = \prod_{i=1}^n \left[ \prod_{k=1}^{K_n} \lambda_k^{I(T_i=t_k)} \exp(\mathbf{Z}_i^\top \boldsymbol{\beta}) \exp \left\{ - \sum_{A_i \leq t_k \leq T_i} \lambda_k \exp(\mathbf{Z}_i^\top \boldsymbol{\beta}) \right\} \right]^{\Delta_i} \\ \times \left[ \exp \left\{ - \sum_{A_i \leq t_k \leq L_i} \lambda_k \exp(\mathbf{Z}_i^\top \boldsymbol{\beta}) \right\} - I(R_i < \infty) \exp \left\{ - \sum_{A_i \leq t_k \leq R_i} \lambda_k \exp(\mathbf{Z}_i^\top \boldsymbol{\beta}) \right\} \right]^{1-\Delta_i},$$

where  $\boldsymbol{\theta}$  is a vector containing all parameters to be estimated.

For the  $i$ th subject, we introduce a set of new independent latent variables  $\{W_{ik}; k = 1, 2, \dots, K_n\}$ , where  $W_{ik}$  is a Poisson random variable with mean  $\lambda_k \exp(\mathbf{Z}_i^\top \boldsymbol{\beta})$ . Then we find that  $L_{1n}^C(\boldsymbol{\theta})$  can be equivalently expressed with Poisson variables as

$$L_{2n}^C(\boldsymbol{\theta}) = \left[ P \left( \sum_{A_i \leq t_k < T_i} W_{ik} = 0 \right) \prod_{k=1}^{K_n} P(W_{ik} = 1)^{I(T_i=t_k)} \right]^{\Delta_i} \\ = \left[ P \left( \sum_{A_i \leq t_k \leq L_i} W_{ik} = 0 \right) P \left( \sum_{L_i < t_k \leq R_i} W_{ik} > 0 \right)^{I(R_i < \infty)} \right]^{1-\Delta_i}$$

Define  $R_i^* = (1 - \Delta_i)(L_i I(R_i = \infty) + R_i I(R_i < \infty)) + \Delta_i T_i$ . By treating the latent variables  $W_{ik}$ 's as observable, the complete data likelihood function is given by

$$L^C(\boldsymbol{\theta}) = \prod_{i=1}^n \prod_{k=1}^{K_n} \left[ \frac{\{\lambda_k \exp(\mathbf{Z}_i^\top \boldsymbol{\beta})\}^{W_{ik}}}{W_{ik}!} \exp\{-\lambda_k \exp(\mathbf{Z}_i^\top \boldsymbol{\beta})\} \right]^{I(A_i \leq t_k \leq R_i^*)},$$

which subjects to the constraints that  $\sum_{A_i \leq t_k < T_i} W_{ik} = 0$  and  $W_{ik}|_{T_i=t_k} = 1$  if  $\Delta_i = 1$ ,  $\sum_{A_i \leq t_k \leq L_i} W_{ik} = 0$  and  $\sum_{L_i < t_k \leq R_i} W_{ik} > 0$  if  $\Delta_i = 0$  and  $R_i < \infty$ ; and  $\sum_{A_i \leq t_k \leq L_i} W_{ik} = 0$  if  $\Delta_i = 0$  and  $R_i = \infty$ .

In the E-step, we take conditional expectations with respect to all latent variables in  $\log\{L^C(\boldsymbol{\theta})\}$ , which yields

$$Q(\boldsymbol{\theta}) = \frac{1}{n} \sum_{i=1}^n \sum_{k=1}^{K_n} I(A_i \leq t_k \leq R_i^*) [E(W_{ik}) \log\{\lambda_k \exp(\mathbf{Z}_i^\top \boldsymbol{\beta})\} - \lambda_k \exp(\mathbf{Z}_i^\top \boldsymbol{\beta})].$$

We ignored the conditional arguments including the observed data and the estimate of  $\boldsymbol{\theta}$  at the  $l$ th iteration denoted by  $\boldsymbol{\theta}^{(l)}$  in the the expressions of  $E(W_{ik})$ 's, which have the form:  $E(W_{ik}) = 0$  if  $\Delta_i = 1$  and  $A_i \leq t_k < T_i$ , and  $E(W_{ik}) = 1$  if  $\Delta_i = 1$  and  $T_i = t_k$ ;  $E(W_{ik}) = 0$  if  $\Delta_i = 0$  and  $A_i \leq t_k \leq L_i$ , and

$$E(W_{ik}) = \frac{\lambda_k \exp(\mathbf{Z}_i^\top \boldsymbol{\beta})}{1 - \exp \left\{ - \sum_{L_i < t_k \leq R_i} \lambda_k \exp(\mathbf{Z}_i^\top \boldsymbol{\beta}) \right\}}, \quad \text{if } L_i < t_k \leq R_i \text{ and } R_i < \infty.$$

In the M-step, by setting  $\partial Q(\boldsymbol{\theta})/\partial \lambda_k = 0$ , we can update  $\lambda_k$  with the following closed-form expression

$$\lambda_k = \frac{\sum_{i=1}^n I(A_i \leq t_k \leq R_i^*) E(W_{ik})}{\sum_{i=1}^n I(A_i \leq t_k \leq R_i^*) \exp(\mathbf{Z}_i^T \boldsymbol{\beta})}, \quad k = 1, \dots, K_n.$$

By substituting the estimator of each  $\lambda_k$  above into  $Q(\boldsymbol{\theta})$ , we obtain the score equation for  $\boldsymbol{\beta}$  as

$$\sum_{i=1}^n \left\{ \sum_{k=1}^{K_n} \left[ I(A_i \leq t_k \leq R_i^*) E(W_{ik}) \left( \mathbf{Z}_i - \frac{\sum_{i=1}^n I(A_i \leq t_k \leq R_i^*) \exp(\mathbf{Z}_i^T \boldsymbol{\beta}) \mathbf{Z}_i}{\sum_{i=1}^n I(A_i \leq t_k \leq R_i^*) \exp(\mathbf{Z}_i^T \boldsymbol{\beta})} \right) \right] \right\} = 0.$$

Repeat the E-step and M-step until the convergence is achieved, and the covariance estimation of  $\hat{\boldsymbol{\beta}}$ , the estimate of  $\boldsymbol{\beta}$ , can be accomplished by the profile likelihood approach given in Zeng et al. (2016) and others.

## References

Zeng, Donglin and Mao, Lu and Lin, DY (2016). Maximum likelihood estimation for semiparametric transformation models with interval-censored data. *Biometrika*. 103(2), 253-271.
